# Supplementary material
Source: publisher figshare collection journal article supplement (https://springernature.figshare.com/ndownloader/files/21929148)
Supplement: Supplementary file [file 21929148]

**Analyses of energy metabolism and stress defence provide insights into *Campylobacter concisus* growth and pathogenicity**

**Table S7: Query genes and proteins from *C. jejuni* subsp. *jejuni* NCTC 11168, *E. coli* strain K-12 MG1655, and *C. jejuni* subsp. *jejuni* strain 81116 used to identify genes and proteins for amino acid use in *C. concisus***

| Gene name    | Locus tag            | Function                                                                                             | Reference |
|--------------|----------------------|------------------------------------------------------------------------------------------------------|-----------|
| <i>sdaA</i>  | <i>cj1624c</i>       | serine dehydratase converts serine to pyruvate                                                       | 1         |
| <i>sdaC</i>  | <i>cj1625c</i>       | transports serine                                                                                    | 1         |
| <i>putA</i>  | <i>cj1503c</i>       | proline dehydrogenase converts proline to S-1-pyrroline carboxylate                                  | 2         |
| <i>putP</i>  | <i>cj1502c</i>       | transports proline                                                                                   | 2         |
| <i>dcuA</i>  | <i>cj0088</i>        | uptake of fumarate and aspartate                                                                     | 3         |
| <i>dcuB</i>  | <i>cj0671</i>        | uptake of fumarate and aspartate, succinate efflux                                                   | 3         |
| <i>dctA</i>  | <i>cj1192</i>        | uptake of fumarate, aspartate and succinate                                                          | 3         |
| <i>aspA</i>  | <i>cj0087</i>        | aspartate ammonia lyase converts aspartate to fumarate and ammonia                                   | 4         |
| <i>aspB</i>  | <i>cj0762c</i>       | aspartate:glutamate transaminase converts glutamate and oxaloacetate to 2-oxoglutarate and aspartate | 4         |
| <i>ansB</i>  | <i>cj0029</i>        | asparaginase deaminates asparagine to aspartate                                                      | 5         |
|              | <i>cj0919c</i>       | ABC-type amino-acid transporter permease                                                             | 6         |
|              | <i>cj0920c</i>       | ABC-type amino-acid transporter permease                                                             | 6         |
| <i>peb1a</i> | <i>cj0921c</i>       | aspartate/glutamate-binding protein of ABC transporter                                               | 6         |
| <i>pebC</i>  | <i>cj0922c</i>       | ABC-type amino-acid transporter ATP-binding protein                                                  | 6         |
| <i>paqP</i>  | <i>cj0467</i>        | ABC-type glutamate transporter permease                                                              | 7         |
| <i>paqQ</i>  | <i>cj0468</i>        | ABC-type glutamate transporter ATP-binding protein                                                   | 7         |
| <i>gdhA</i>  | <i>b1761</i>         | glutamate dehydrogenase converts glutamate to 2-oxoglutarate                                         | 8         |
| <i>livJ</i>  | <i>CJJ81176_1038</i> | periplasmic binding protein for branched chain amino acid transport                                  | 9         |
| <i>livK</i>  | <i>CJJ81176_1037</i> | periplasmic binding protein for branched chain amino acid transport                                  | 9         |
| <i>livH</i>  | <i>CJJ81176_1036</i> | inner membrane permease for branched chain amino acid transport                                      | 9         |
| <i>livM</i>  | <i>CJJ81176_1035</i> | inner membrane permease for branched chain amino acid transport                                      | 9         |
| <i>livG</i>  | <i>CJJ81176_1034</i> | cytoplasmic ATPase for branched chain amino acid transport                                           | 9         |
| <i>livF</i>  | <i>CJJ81176_1033</i> | cytoplasmic ATPase for branched chain amino acid transport                                           | 9         |
